# Supplementary material for: Pulmonary Arterial Hypertension Associated with Portal Hypertension and HIV Infection: Comparative Characteristics and Prognostic Predictors
Source: MDPI journal article supplement (doi:10.3390/jcm12103425), 2023-05-12
Supplement: s1 [file s1]

Supplementary Table S1. Univariate Cox regression analysis of Comparative, Prospective Registry of Newly Initiated Therapies for Pulmonary Hyper-tension (COMPERA) and French Pulmonary Hypertension Registry (FPHR) risk scores in the 3 study groups.

|                                        | HR (95% CI)           | p-value |
|----------------------------------------|-----------------------|---------|
| - Po-PAH                               |                       |         |
| COMPERA baseline risk, low/interm/high | 1.390 (0.948 – 2.037) | 0.091   |
| FPHR baseline risk, low/interm/high    | 1.365 (0.978 – 1.903) | 0.067   |
| - HIV-PAH                              |                       |         |
| COMPERA baseline risk, low/interm/high | 1.723 (0.843 – 3.519) | 0.136   |
| FPHR baseline risk, low/interm/high    | 1.397 (0.805 – 2.425) | 0.234   |
| - HIV/Po-PAH                           |                       |         |
| COMPERA baseline risk, low/interm/high | 0.481 (0.156 – 1.483) | 0.203   |
| FPHR baseline risk, low/interm/high    | 0.546 (0.157 – 1.902) | 0.342   |
